# Supplementary material for: Assessment of laser-synthesized Si nanoparticle effects on myoblast motility, proliferation and differentiation: towards potential tissue engineering applications
Source: Royal Society of Chemistry journal article supplement (doi:10.1039/d3na01020a), 2024-01-01
Supplement: d3na01020a1.pdf [file d3na01020a1.pdf]

## Assessment of laser-synthesized Si nanoparticles effects on myoblasts motility, proliferation and differentiation: towards potential tissue engineering applications

Clarissa Murru<sup>a</sup>, Lucas Duvert<sup>a,b</sup>, Frederique Magdinier<sup>b</sup>, Adrien Casanova<sup>a</sup>, Anne-Patricia Alloncle<sup>a</sup>, Stefano Testa<sup>b\*</sup>, Ahmed Al-Kattan<sup>a\*</sup>

### Supplementary Material

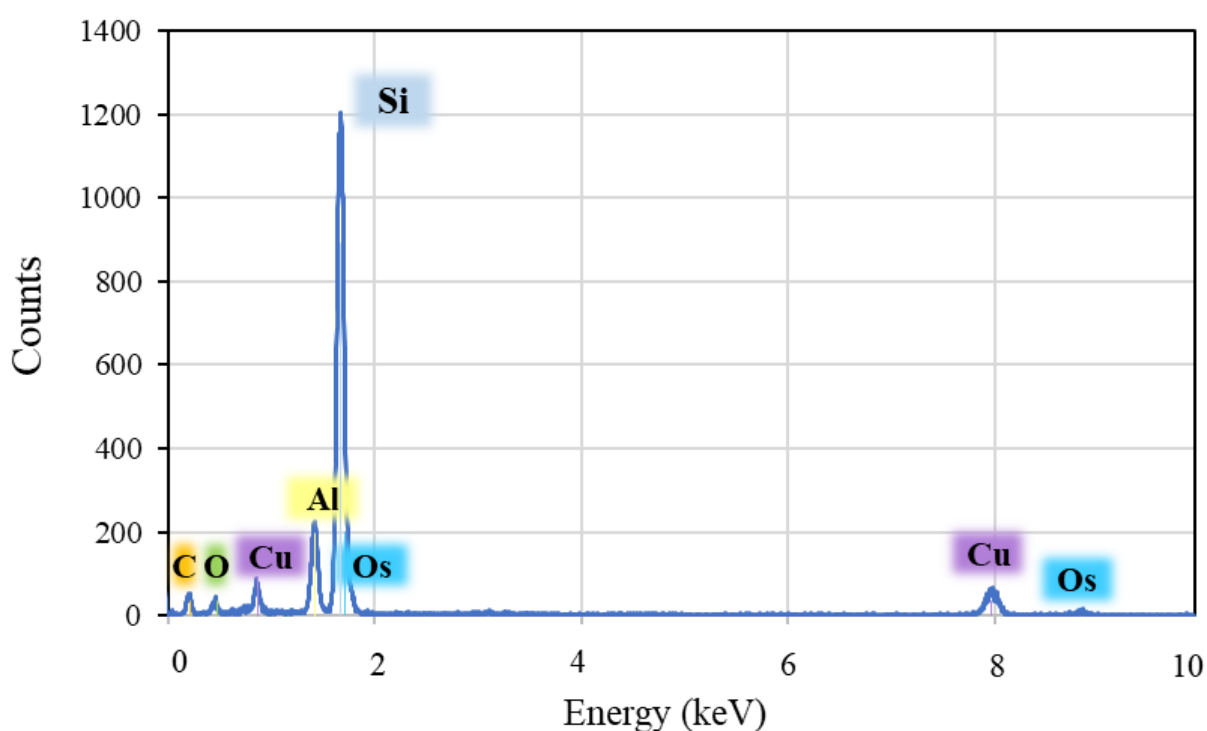

**Supplementary Figure 1. Energy-dispersive X-ray spectroscopy of Si-NPs.** EDS was performed in the section of the sample where the nanoparticles were detected. The obtained spectrum confirmed the internalization of Si-NPs while the other elements displayed derive by the composition of the resin, the products applied for fixing the cells and the grid used to observe the sample.

|            | Significativity | P values |
|------------|-----------------|----------|
| ctrl vs 14 | **              | 0.0070   |
| ctrl vs 28 | ****            | <0.0001  |
| ctrl vs 56 | *               | 0.0133   |
| 14 vs 28   | ***             | 0.0003   |
| 14 vs 56   | ns              | 0.9574   |
| 28 vs 56   | ***             | 0.0002   |

**Supplementary Table 1. Statistical validation of Fusion Index analysis.** For each Si-NPs concentration tested p values and statistical significance are reported. The p values are calculated using a one-way ANOVA with Tukey's multiple comparisons test.

|            | day 1   |         | day 3   |         | day 6   |         | day 8   |         |
|------------|---------|---------|---------|---------|---------|---------|---------|---------|
|            | signif. | P value |
| ctrl vs 14 | ns      | 0.6909  | ns      | 0.9805  | ns      | 0.4143  | ns      | 0.1818  |
| ctrl vs 28 | ns      | 0.0506  | **      | 0.0025  | ***     | 0.0006  | ****    | <0.0001 |
| ctrl vs 56 | ns      | 0.1192  | *       | 0.0165  | *       | 0.0203  | ns      | 0.8206  |
| 14 vs 28   | ns      | 0.2382  | **      | 0.0038  | **      | 0.0034  | ***     | 0.0002  |
| 14 vs 56   | *       | 0.0250  | *       | 0.0100  | **      | 0.0026  | ns      | 0.5256  |
| 28 vs 56   | **      | 0.0019  | ****    | <0.0001 | ****    | <0.0001 | ****    | <0.0001 |

**Supplementary Table 2. Statistical validation of the growth curves analysis.** For each Si-NPs concentration tested at each experimental point, p values and statistical significance are reported. The concentration of 28 µg/mL is the only one that is significant compared to the other conditions starting on day 3 (light blue lines).

|            | hours post-scratch |   |     |    |      |     |      |    |      |    |      |    |      |    |      |    |      |    |      |      |    |  |
|------------|--------------------|---|-----|----|------|-----|------|----|------|----|------|----|------|----|------|----|------|----|------|------|----|--|
|            | 7.5                | 8 | 8.5 | 9  | 9.5  | 10  | 10.5 | 11 | 11.5 | 12 | 12.5 | 13 | 13.5 | 14 | 14.5 | 15 | 15.5 | 16 | 16.5 | 17.5 | 18 |  |
| ctrl vs 14 |                    |   |     |    |      |     |      |    |      |    | *    |    |      |    |      |    |      |    |      |      |    |  |
| ctrl vs 28 |                    |   |     |    | *    | **  |      |    |      |    |      |    |      |    |      |    |      |    |      |      |    |  |
| ctrl vs 56 |                    |   |     |    |      |     |      |    |      |    |      |    |      |    |      |    |      |    |      |      |    |  |
| 14 vs 28   |                    |   |     |    |      |     |      |    |      |    |      |    |      |    |      |    |      |    |      |      |    |  |
| 14 vs 56   |                    | * | *   | ** | **   | **  | **   | *  | ***  | ** | **   | ** |      | ** | *    | *  | ***  | ** | **   | *    | *  |  |
| 28 vs 56   | *                  | * | *   | *  | **** | *** | **   | ** | ***  | ** | *    | ** | *    |    |      |    | **   | *  | **   |      |    |  |

**Supplementary Table 3. Statistical validation of the Scratch-wound healing assay.** For each Si-NPs concentration tested at each experimental point, p values and statistical significance are reported. Only experimental time points showing a statistically significant result are presented.

| Gene     | Time 2   |                |          |                | Time 3   |                |          |                |          |                |
|----------|----------|----------------|----------|----------------|----------|----------------|----------|----------------|----------|----------------|
|          | 28 µg/ml |                | 56 µg/ml |                | 14 µg/ml |                | 28 µg/ml |                | 56 µg/ml |                |
|          |          | <i>p value</i> |
| MyoD     | *        | 0.0259         | *        | 0.0124         | *        | 0.0259         | *        | 0.0439         | *        | 0.0324         |
| Desmin   | *        | 0.0126         |          |                |          |                |          |                |          |                |
| MHC      |          |                |          |                |          |                |          |                | *        | 0.0127         |
| Myomaker |          |                |          |                | *        | 0.0115         |          |                | **       | 0.0054         |
| Ki-67    | **       | 0.0058         | **       | 0.0060         |          |                |          |                | **       | 0.0068         |
| C-met    | ***      | 0.0006         | ***      | 0.0001         |          |                |          |                |          |                |

**Supplementary Table 4. Statistical validation of qRT-PCR analysis.** For each gene studied at each Si-NPs concentration tested and each experimental time point, p values and statistical significance are reported. Values were calculated using the  $\Delta\text{Ct}$  of the target gene *versus* the  $\Delta\text{Ct}$  of the control gene. Statistical significance was determined using the Ordinary one-way ANOVA with Dunnett's multiple comparisons test.

| Gene            | Si-NPs - 14 µg/ml |          |          | Si-NPs - 28 µg/ml |          |          | Si-NPs - 56 µg/ml |          |          |
|-----------------|-------------------|----------|----------|-------------------|----------|----------|-------------------|----------|----------|
|                 | T1 vs T2          | T1 vs T3 | T2 vs T3 | T1 vs T2          | T1 vs T3 | T2 vs T3 | T1 vs T2          | T1 vs T3 | T2 vs T3 |
| <b>MyoD</b>     |                   | \$\$\$   | \$\$\$   |                   | \$\$     | \$       |                   | \$\$     |          |
| <i>p value</i>  |                   | 0.0005   | 0.0001   |                   | 0.0037   | 0.0448   |                   | 0.0024   |          |
| <b>Desmin</b>   |                   | \$\$\$   | \$\$\$   |                   |          |          |                   |          |          |
| <i>p value</i>  |                   | 0.001    | 0.0007   |                   |          |          |                   |          |          |
| <b>MHC</b>      |                   | \$       |          | \$                | \$\$     |          |                   | \$\$\$   | \$\$     |
| <i>p value</i>  |                   | 0.0159   |          | 0.0272            | 0.0019   |          |                   | 0.0009   | 0.0058   |
| <b>Myomaker</b> |                   | \$\$\$   | \$\$     | \$\$              | \$\$\$   |          | \$                | \$\$     |          |
| <i>p value</i>  |                   | 0.0005   | 0.0014   | 0.0015            | 0.0002   |          | 0.0464            | 0.0034   |          |
| <b>Ki-67</b>    | \$\$              | \$       |          | \$\$\$            |          | \$\$     |                   |          |          |
| <i>p value</i>  | 0.0079            | 0.013    |          | 0.0002            |          | 0.0023   |                   |          |          |
| <b>C-met</b>    |                   |          |          | \$\$\$            |          | \$\$\$   | \$\$\$            |          | \$\$\$   |
| <i>p value</i>  |                   |          |          | 0.0010            |          | 0.0016   | 0.0001            |          | 0.0007   |

**Supplementary Table 5. Significance and p values based on the  $2^{-\Delta\Delta\text{Ct}}$  values.** For each gene studied at each Si-NPs concentration tested and each experimental time point, p values and statistical significance are reported. In particular, for each gene the trend during the 3 experimental time points for each concentration of Si-NPs tested was investigated, using the Ordinary one-way ANOVA with Tukey's multiple comparisons test.
